# Supplementary material for: A dendrite growth-suppressing Li composite anode decorated with lithiophilic Li–Pb alloys for stable Li metal batteries
Source: Royal Society of Chemistry journal article supplement (doi:10.1039/d5cc01302j), 2025-01-01
Supplement: d5cc01302j1.pdf [file d5cc01302j1.pdf]

## Electronic Supplementary Information

### **A dendrite-suppressed Li composite anode decorated by lithiophilic Li-Pb alloys for stable Li metal batteries**

Jing Bai,<sup>‡a</sup> Ziwei Zhu,<sup>‡a</sup> Xue Liu,<sup>a</sup> and Sheng Liu<sup>\*a</sup>

Institute of New Energy Material Chemistry, School of Materials Science and Engineering,  
Nankai University, Tianjin 300350, China. E-mail: shengliu@nankai.edu.cn.

#### **1. Experimental Section**

***Fabrication of the Li-Pb alloy electrodes:*** The composite electrodes were fabricated by using a mechanical rolling method. Specifically, after polishing with a soft brush, Li foils and Pb foils in the atomic ratio of 88:5 were stacked in the sequence of Li-Pb-Li, followed by folding and roller pressing under a pressure of 4 tons in an Ar-filled glovebox. This process was repeated 20 times for full compounding between Li and Pb. Finally, the obtained composite sheet with a thickness of 500  $\mu\text{m}$  was punched into round electrode plates with a diameter of 14 mm.

***Preparation of the  $\text{Li}_4\text{Ti}_5\text{O}_{12}$  electrodes:*** To assemble the full cells,  $\text{Li}_4\text{Ti}_5\text{O}_{12}$  (LTO) electrodes were fabricated. The LTO electrode slurry was prepared by mixing  $\text{Li}_4\text{Ti}_5\text{O}_{12}$  (Shenzhen Kejing Star Co.), conductive carbon (Super P) and polycylnidene fluoride (PVdF) (8:1:1 by weight ratio) in N-methylpyrrolidone (NMP). After stirring for 5 hours, the slurry was coated with a thickness of 75  $\mu\text{m}$  on a clean copper foil, followed by drying at 100  $^{\circ}\text{C}$  for 12 h and punching into round electrode plates with a diameter of 10 mm.

***Materials characterizations:*** X-ray diffractometer (XRD, Rigaku mini Flex II) was employed to test the phase composition of the samples with Cu  $\text{K}\alpha 1$  radiation ( $\lambda = 0.15405 \text{ nm}$ ), and the scanning

range ( $2\theta$ ) of patterns was  $5-85^\circ$  with a controlled scanning speed ( $4^\circ \text{ min}^{-1}$ ). The morphologies of Li metals and Li-Pb alloy electrodes as well as the element distribution of Li-Pb alloy electrodes were characterized by using a scanning electron microscope (SEM, Supra 55VP, Zeiss) equipped with the energy dispersive spectrometry (EDS) system. The distribution of Li and Pb in the Li-Pb composite electrodes was analyzed by laser-induced breakdown spectroscopy (LIBS, ASI J200) within an area of  $4.5 \text{ mm} \times 4.5 \text{ mm}$ . Lithium dendrite growth on Li and Li-Pb composite electrodes was monitored in a transparent optical cell using optical microscopy (Nikon SMZ800N). The X-ray photoelectron spectra (XPS, Thermo Scientific ESCALAB 250Xi) were carried out to analyze the chemical composition of SEI.

**Electrochemical tests:** Coin-type cells (2032) were assembled in glovebox filled with argon atmosphere ( $\text{O}_2 \leq 0.1 \text{ ppm}$ ,  $\text{H}_2\text{O} \leq 0.1 \text{ ppm}$ ) to evaluate the electrochemical performance. The symmetric cells and full cells were assembled with Clegard 2300 as the separator and  $40 \mu\text{L}$  electrolyte for each cell. The electrolyte consists of 1 M lithium bis (trifluoromethanesulfonyl) imide (LiTFSI) and 0.2 M  $\text{LiNO}_3$  as additive in 1,2-dimethoxyethane (DME) and 1,3-dioxolane (DOL) (1:1 by volume). Electrochemical impedance spectra (EIS) were performed on a Zahner IM6ex electrochemical workstation with a frequency range of 10 mHz to 100 kHz and an amplitude of 5 mV. The symmetric cells of Li/Li and Li-Pb/Li-Pb were assembled to explore the stripping/plating behavior of lithium and monitor the changes in voltage polarization during long-term galvanostatic cycles with a capacity of  $1 \text{ mAh cm}^{-2}$  under various current densities ( $0.2, 0.5$  and  $5 \text{ mA cm}^{-2}$ ). The long-term cycling stability of the different electrodes in symmetrical cells was evaluated with a higher capacity of  $5 \text{ mAh cm}^{-2}$  at  $5 \text{ mA cm}^{-2}$ . The full cells of Li/LTO and Li-Pb/LTO were assembled and cycled at 1 C rate to obtain the charge-discharge curves and cycling performance of

different anodes. The cutoff potentials for discharge and charge were 1.0 and 2.2 V, respectively.

All discharge/charge tests were carried out with LAND-CT2001A instruments (Wuhan Jinnuo, China).

## 2. Supporting figures

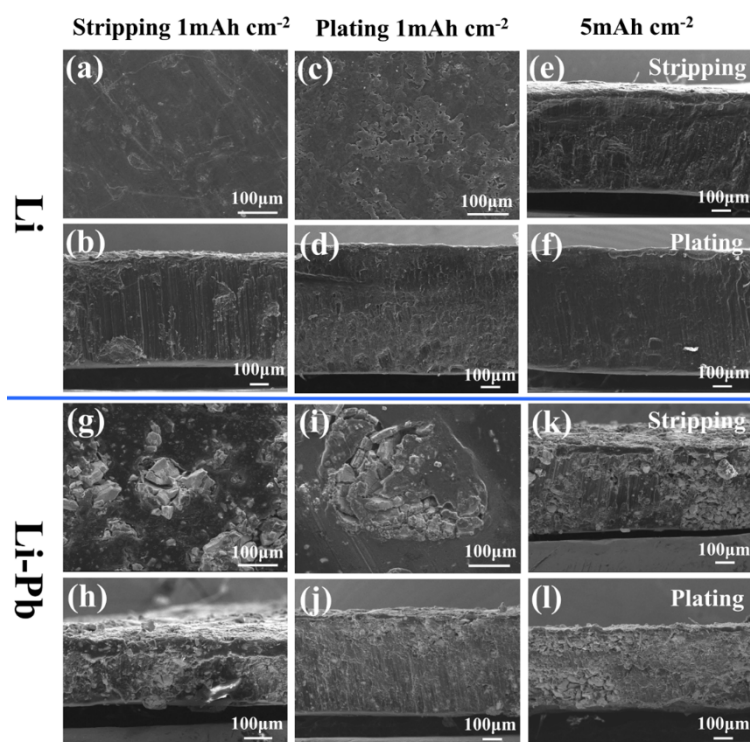

**Fig. S 1** Top view SEM images of Li and Li-Pb alloy electrodes after stripping lithium for  $1 \text{ mAh cm}^{-2}$  (a, g); Cross-sectional SEM images of Li and Li-Pb alloy electrodes after stripping lithium for  $1 \text{ mAh cm}^{-2}$  (b, h),  $5 \text{ mAh cm}^{-2}$  (e, f); Top view SEM images of Li and Li-Pb alloy electrodes after plating lithium for  $1 \text{ mAh cm}^{-2}$  (c, i); and Cross-sectional SEM images of Li and Li-Pb alloy electrodes after plating lithium for  $1 \text{ mAh cm}^{-2}$  (d, j),  $5 \text{ mAh cm}^{-2}$  (f, l). The current density is fixed at  $0.5 \text{ mA cm}^{-2}$ .

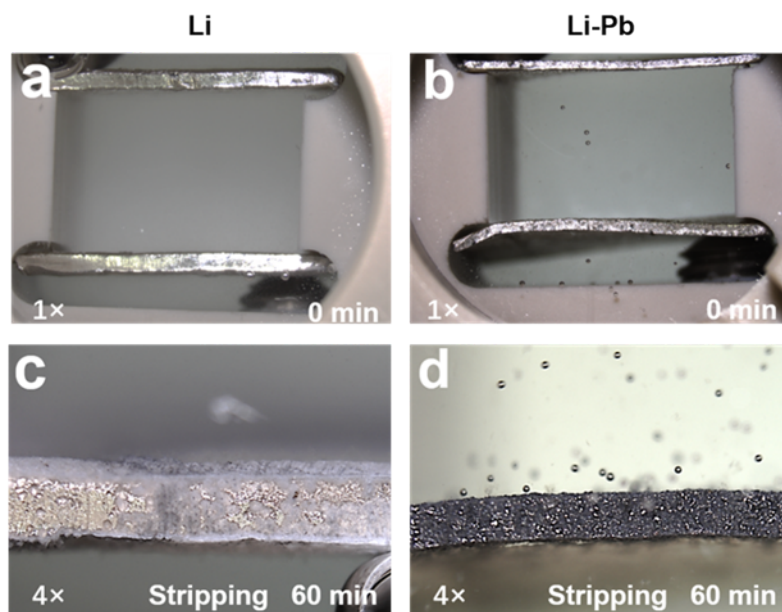

**Fig. S 2** Cross-section images of Li and Li-Pb alloys standing (a and b) and stripping at 10 mA cm<sup>-2</sup> for 10 mAh cm<sup>-2</sup> (c and d) in in-situ cells.

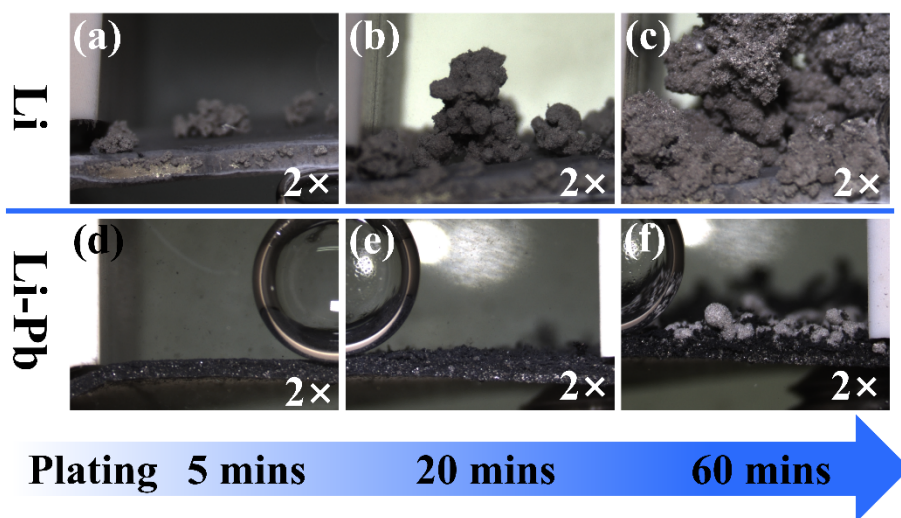

**Fig. S 3** Cross-section images of Li (a, b, c) and Li-Pb (d, e, f) alloys after Li stripping for 10 mA h cm<sup>-2</sup> and plating for 5 mins, 20 mins, and 60 mins at the current density of 10 mA cm<sup>-2</sup> in in-situ cells.

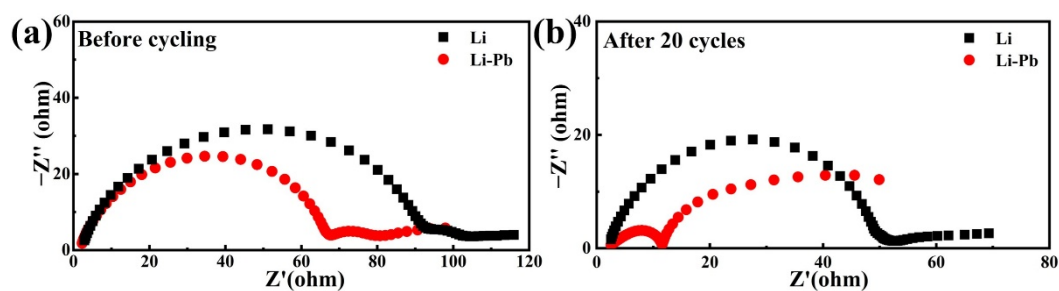

**Fig. S 4** Electrochemical impedance spectra of symmetrical cells with different electrodes (a) before cycling and (b) after 20 cycles.

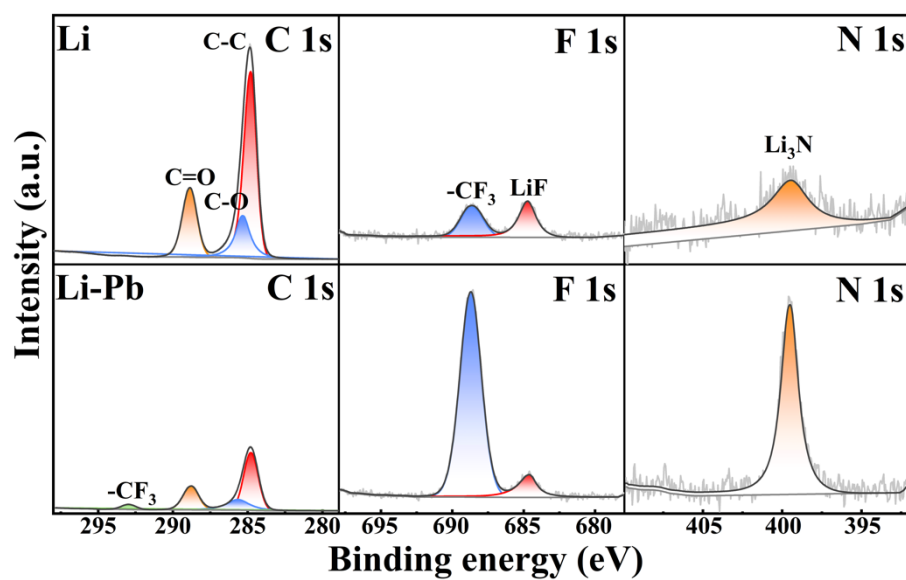

**Fig. S 5** C 1s, F 1s and N 1s characteristic peaks of XPS spectra for different electrodes after 20 cycles in symmetrical cells at  $0.5 \text{ mA cm}^{-2}$  for  $0.5 \text{ mAh cm}^{-2}$ .

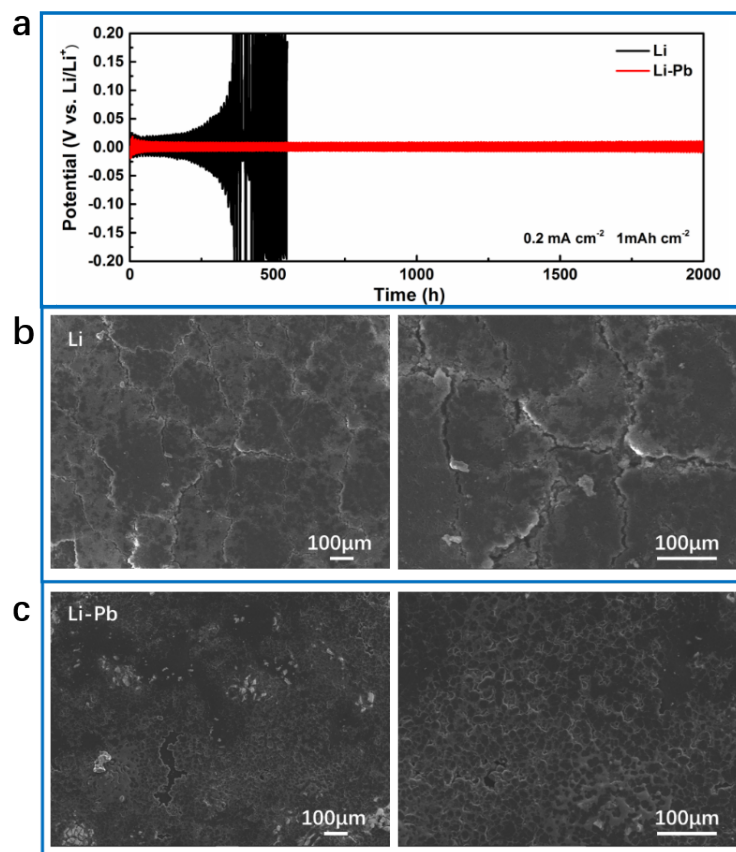

**Fig. S 6** (a) Voltage profiles of the Li-Pb and Li-Li symmetric cells at  $0.2 \text{ mA cm}^{-2}$  for  $1 \text{ mAh cm}^{-2}$ ; SEM images of the (b) Li and (c) Li-Pb alloy anode after cycling for 500 h.

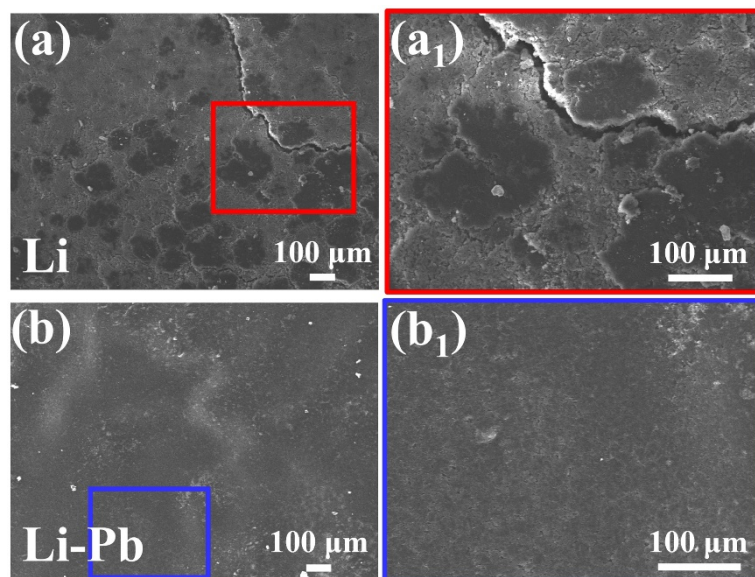

**Fig. S 7** The SEM images of the (a and a<sub>1</sub>) Li and (b and b<sub>1</sub>) Li-Pb alloy electrodes after cycling for 500 h.

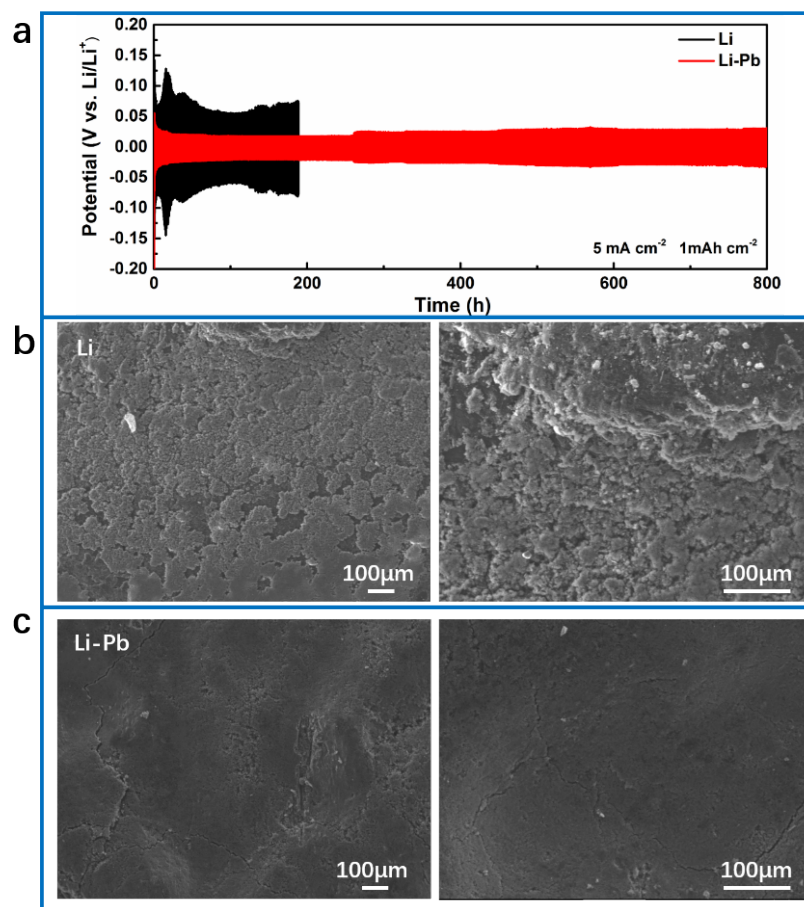

**Fig. S 8** (a) Voltage profiles of the Li-Pb and Li-Li symmetric cells at 5 mA cm<sup>-2</sup> for 1 mAh cm<sup>-2</sup>; SEM images of the (b) Li and (c) Li-Pb alloy anode after cycling for 500 h.

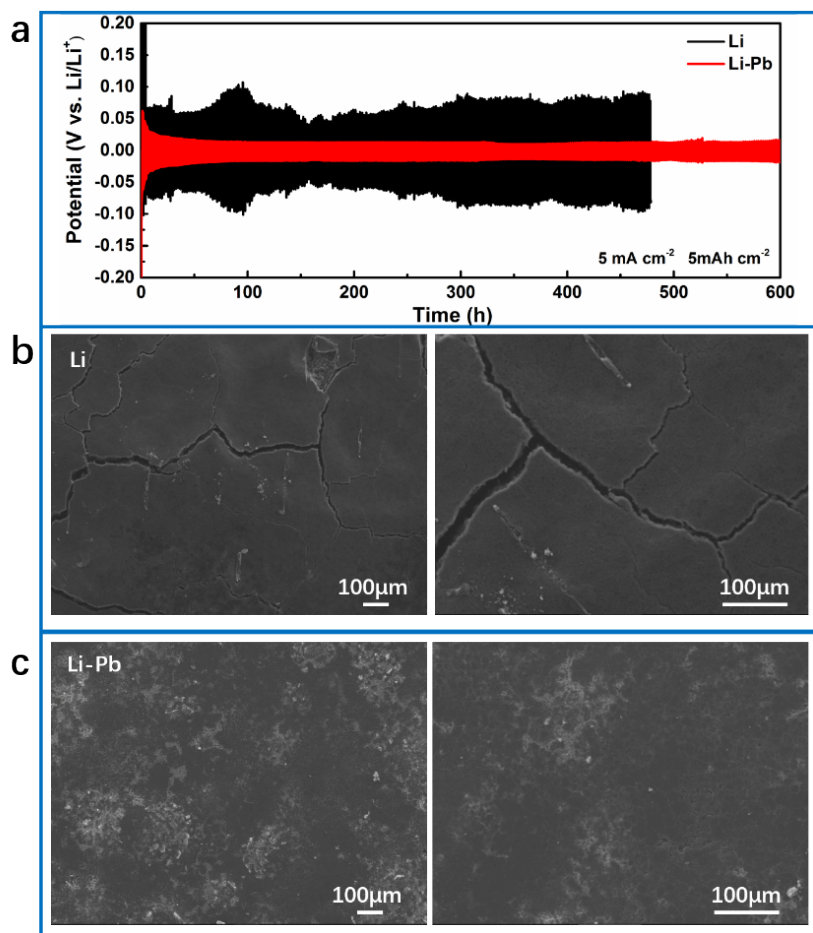

**Fig. S 9** (a) Voltage profiles of the Li-Pb and Li-Li symmetric cells at  $5\text{ mA cm}^{-2}$  for  $5\text{ mAh cm}^{-2}$ ; SEM images of the (b) Li and (c) Li-Pb alloy anode after cycling for 500 h.

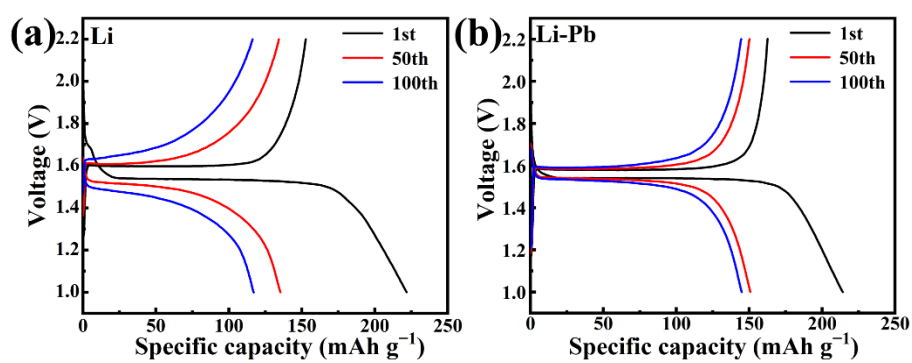

**Fig. S 10** The charge-discharge curves (a and b) of the full cells with  $\text{Li}_4\text{Ti}_5\text{O}_{12}$  cathodes.
